# Supplementary material
Source: publisher site journal article supplement (https://www.dovepress.com/article/366760)
Supplement: Supplementary file 1 [file get_supplementary_file.php]

# Supplementary material to the paper

# “Use of Selective Serotonin Reuptake Inhibitors – Validity of self-report versus plasma concentrations and pharmacy dispensations – A cross-sectional analysis of the Norwegian Women and Cancer study”

# Laboratory analyses of SSRI in plasma

## Chemicals and reagents

Citalopram, N-desmethylcitalopram (citalopram M1), paroxetine, fluvoxamine, fluoxetine, norfluoxetine (fluoxetine M1), sertraline, citalopram D6, paroxetine D6, and all solvents used for LC-analysis (HPLC grade) were obtained from Sigma (St Louis, MO, USA), whereas didemethylcitalopram (citalopram M2), N-desmethyl sertraline (sertraline M1), fluvoxamine D4, fluoxetine D5, and sertraline D3 were supplied by Toronto Research Chemicals (Toronto, Canada).

An internal standard (IS) solution was prepared in methanol with citalopram D6, paroxetine D6, fluvoxamine D4, fluoxetine D5 and sertraline D3 at a concentration level of 0.5 µg/ml for each substance.

## Analysis of plasma samples

Plasma samples were prepared by adding 100 µl of plasma, 20 µl of the IS solution, and 300 µl of 1% formic acid in acetonitrile to an Ostro 96-well Protein Precipitation & Phospholipid Removal Plate (Waters, Milford, MA, USA). After vortex mixing, vacuum was applied to pass the mixtures through the plate. The collected samples were evaporated to dryness and reconstituted with 100 µl of water/methanol (70/30). A 10 µl aliquot was injected onto the LC-MS/MS instrument.

The analysis was carried out on a Quattro Premier XE mass spectrometer coupled to a Acquity H class UHPLC system (Waters, Milford, MA, USA). Chromatographic separation was performed using an Acquity UPLC BEH C18 column (100 x 2.1 mm i.d., 1.7 um particle size). The temperature of the analytical column was maintained at 50°C. The mobile phase was composed of water containing 0.1% formic acid (solvent A) and methanol containing 0.1% formic acid (solvent B). A gradient elution program was employed at a constant flow rate of 0.2 ml/min with the following gradient: 30% B (0-1 min), 30-100% B (1- 8 min), 100% B (8-10 min), and 30% B (10-14 min).

The mass spectrometer was equipped with an electrospray ionization source, operated in the positive mode. Source parameters were as follows: capillary voltage 3.0 kV, source temperature 120 C, desolvation temperature 350°C, desolvation gas flow 700 L/h, cone gas flow 9 L/h, and collision gas flow 0.3 ml/min. The instrument was operated in the multiple reaction monitoring (MRM) mode, and selected mass transitions were measured for each compound.

Validation of the analytical assay was carried out in compliance with guidelines from the European Medicines Agency1. For sample analysis, an internal calibration for all investigated analytes in plasma was performed with each batch of samples. Furthermore, a quality control sample was included in each batch.

## Reference

1. <https://www.ema.europa.eu/en/documents/scientific-guideline/ich-q-2-r1-validation-analytical-procedures-text-methodology-step-5_en.pdf>
